# Supplementary material for: Targeting BCL2 with Venetoclax Enhances the Efficacy of the KRASG12D Inhibitor MRTX1133 in Pancreatic Cancer
Source: PubMed Central journal article supplement — Cancer Res. 2024 Aug 13;84(21):3629–39. doi: 10.1158/0008-5472.CAN-23-3574 (PMC11532783; doi:10.1158/0008-5472.can-23-3574), 2024-08-13
Supplement: can-23-3574_figure_s1_suppsf1.pdf [file can-23-3574_figure_s1_suppsf1.pdf]

2138

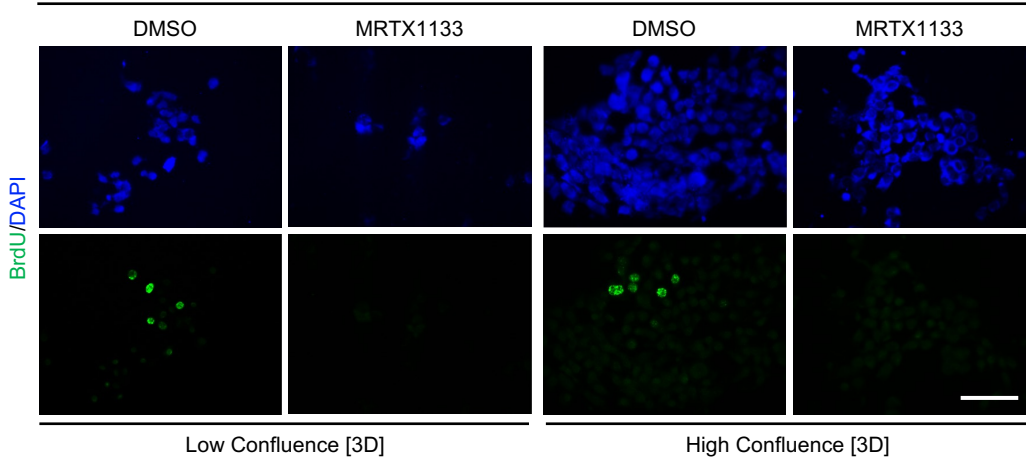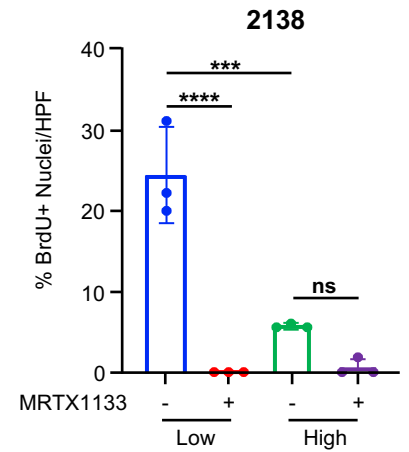

3213

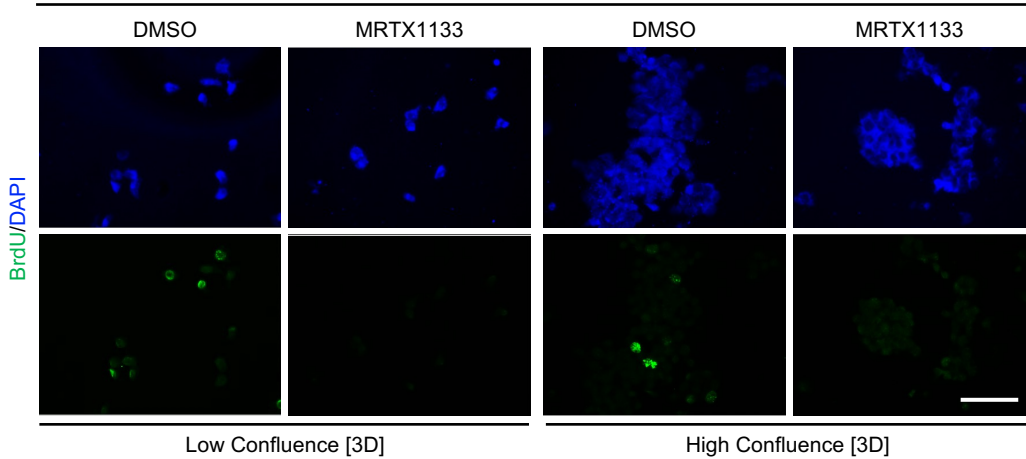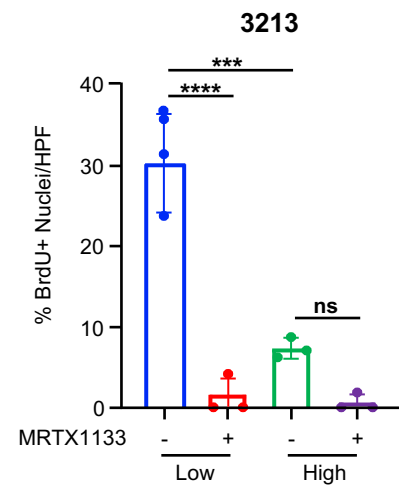

1245

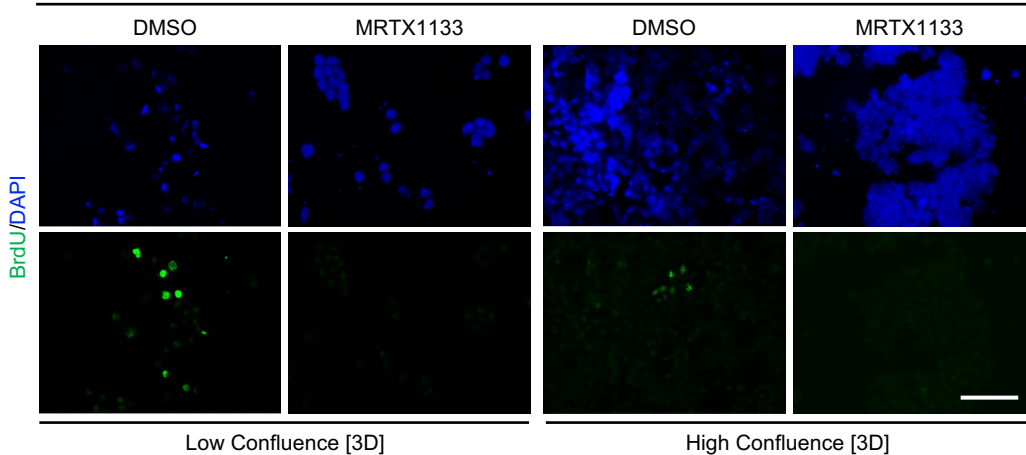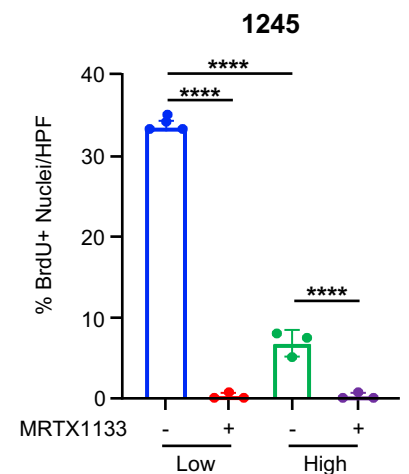

**Supplemental Figure S1: PDAC cells in ‘high’ confluent collagen cultures exhibit reduced proliferation.** PDAC cells were grown in floating collagen gels to generate ‘low’ and ‘high’ confluent collagen cultures, as depicted in Fig. 1. The cells were treated with DMSO or MRTX1133 (0.5 $\mu$ M) for 8 hours. Before collecting the cells, BrdU (2 $\mu$ M) was added for 1 hour to the collagen cultures. The cells were extracted from the gels using collagenase and processed for BrdU staining by immunocytochemistry. Images are representative of 3 biological replicates. Error bars  $\pm$  SD, n=3. One-way ANOVA, followed by Tukey’s multiple comparison test. \*\*\*, p<0.001; \*\*\*\*, p<0.0001; ns, not significant. Scale bar = 75 $\mu$ m.
