# Supplementary material for: Targeting BCL2 with Venetoclax Enhances the Efficacy of the KRASG12D Inhibitor MRTX1133 in Pancreatic Cancer
Source: PubMed Central journal article supplement — Cancer Res. 2024 Aug 13;84(21):3629–39. doi: 10.1158/0008-5472.CAN-23-3574 (PMC11532783; doi:10.1158/0008-5472.can-23-3574), 2024-08-13
Supplement: can-23-3574_figure_s3_suppsf3.pdf [file can-23-3574_figure_s3_suppsf3.pdf]

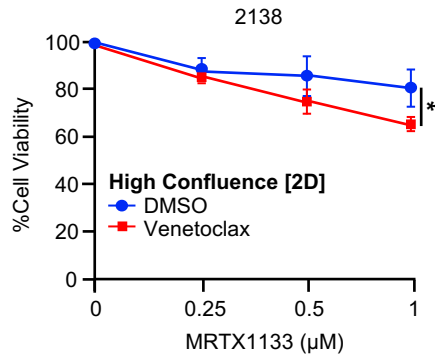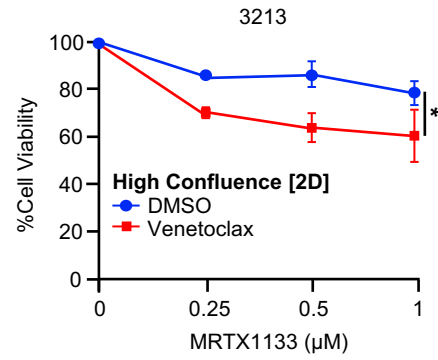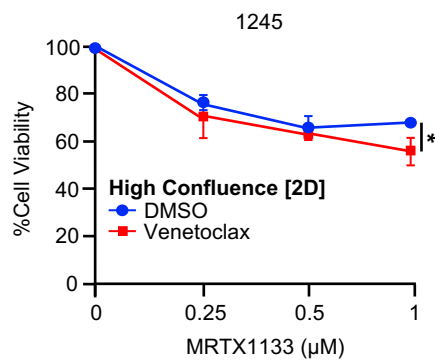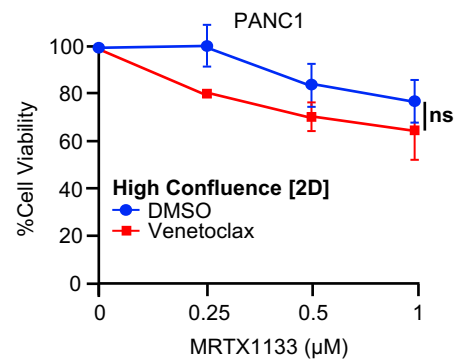

**Supplemental Figure S3: Venetoclax has minimal effects on the efficacy of MRTX1133 on 2D 'high' confluent 2D tissue culture plastic.** PDAC cells were plated at 'high' confluent ( $10 \times 10^3$  cells/well) in 96-well plates for 24 hours and treated with MRTX1133 (0.25 $\mu\text{M}$ , 0.5 $\mu\text{M}$ , 1.0 $\mu\text{M}$ ) and co-treated with DMSO or Venetoclax (2.5 $\mu\text{M}$ ) for 72 hours. Cell viability was determined by MTT assay. Error bars  $\pm$  SD, n=3, unpaired t-test. \*, p<0.05; ns, not significant.
