# Supplementary material for: Targeting BCL2 with Venetoclax Enhances the Efficacy of the KRASG12D Inhibitor MRTX1133 in Pancreatic Cancer
Source: PubMed Central journal article supplement — Cancer Res. 2024 Aug 13;84(21):3629–39. doi: 10.1158/0008-5472.CAN-23-3574 (PMC11532783; doi:10.1158/0008-5472.can-23-3574), 2024-08-13
Supplement: can-23-3574_figure_s6_suppsf6.pdf [file can-23-3574_figure_s6_suppsf6.pdf]

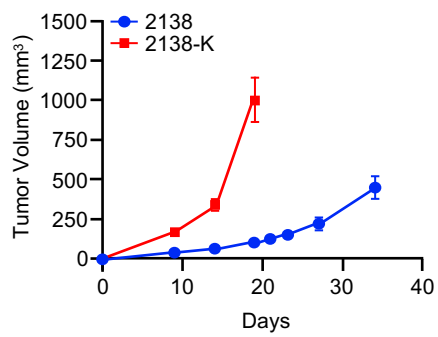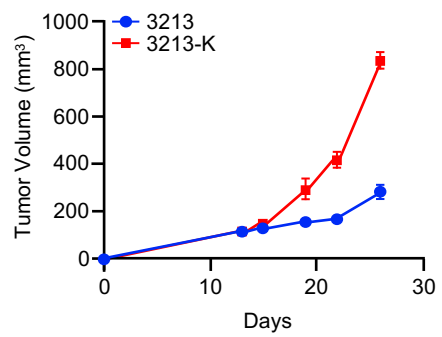

**Supplemental Figure S6: 2138-K and 3213-K cells grow rapidly *in vivo*.** 2138, 2138-K, 3213, and 3213-K cells ( $2.5 \times 10^4$ ) were implanted via subcutaneous injection into the flanks of C57BL/6 mice, and their tumor growth was monitored (n=5-6).
