# Supplementary material for: Targeting BCL2 with Venetoclax Enhances the Efficacy of the KRASG12D Inhibitor MRTX1133 in Pancreatic Cancer
Source: PubMed Central journal article supplement — Cancer Res. 2024 Aug 13;84(21):3629–39. doi: 10.1158/0008-5472.CAN-23-3574 (PMC11532783; doi:10.1158/0008-5472.can-23-3574), 2024-08-13
Supplement: can-23-3574_figure_s7_suppsf7.pdf [file can-23-3574_figure_s7_suppsf7.pdf]

**A**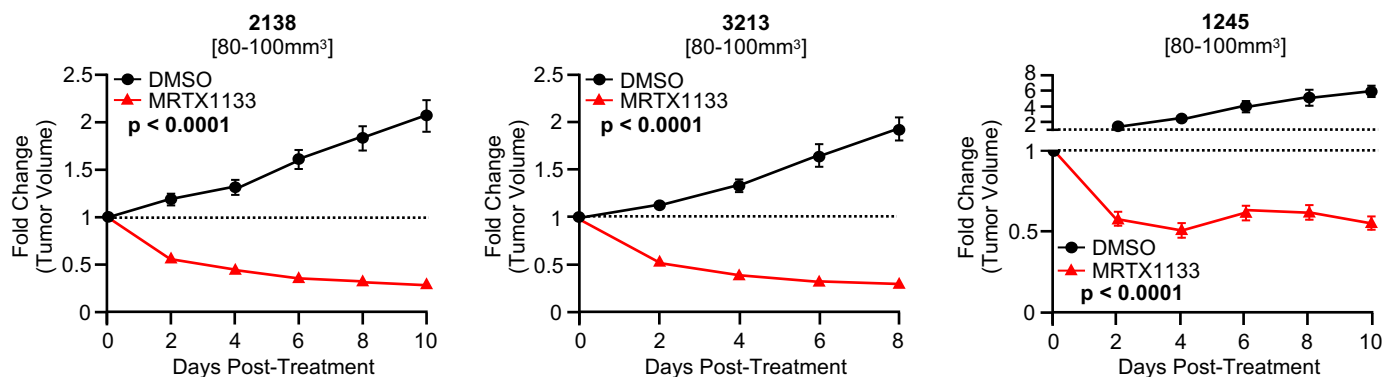**B**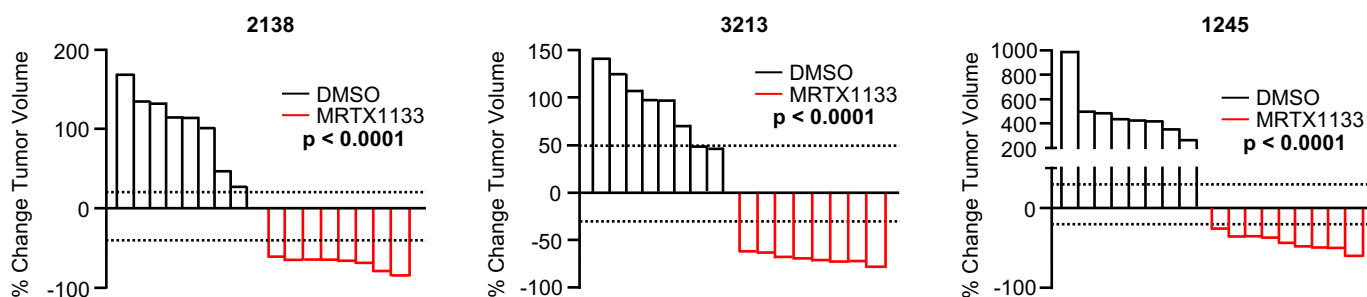

**Supplemental Figure S7: Effect of MRTX1133 on ‘small’ KPC tumors.** 2138, 3213, and 1245 KPC cells were implanted via subcutaneous injection into the flanks of C57BL/6 mice. Once animals developed ~80-100 mm<sup>3</sup> tumors, they were treated with vehicle control (DMSO) or MRTX1133 (30mg/kg 2x/day). **A.** Tumor size was measured 2-3 times/week by caliper, and tumor volume was calculated using the formula  $V = (W^2 \times L)/2$  and normalized to tumor volume at the start of treatment. Error bars  $\pm$  SEM, n=8-9, unpaired t test. \*\*\*\*, p<0.0001. **B.** Relative tumor volumes at study endpoints were compared to tumors at the start of treatment and change in tumor volume was calculated. Unpaired t-test. \*\*\*\*, p<0.0001.
