# Supplementary material for: Targeting BCL2 with Venetoclax Enhances the Efficacy of the KRASG12D Inhibitor MRTX1133 in Pancreatic Cancer
Source: PubMed Central journal article supplement — Cancer Res. 2024 Aug 13;84(21):3629–39. doi: 10.1158/0008-5472.CAN-23-3574 (PMC11532783; doi:10.1158/0008-5472.can-23-3574), 2024-08-13
Supplement: can-23-3574_figure_s8_suppsf8.pdf [file can-23-3574_figure_s8_suppsf8.pdf]

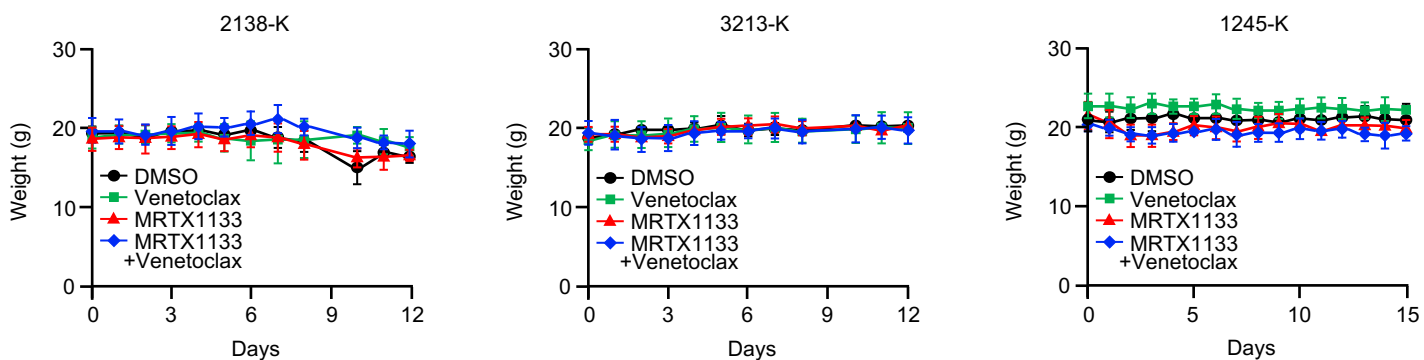

**Supplemental Figure S8: Effect of the combination of MRTX1133 and Venetoclax on the weights of KPC-K tumor-bearing mice.** Mice with 2138-K, 3213-K, and 1245-K tumors (~80-100mm<sup>3</sup>) were treated with vehicle control (DMSO), Venetoclax (15mg/kg daily), MRTX1133 (30mg/kg 2x/day), or the combination of Venetoclax and MRTX1133. The weights of the mice until they reached the study endpoints are shown here. Error bars  $\pm$  SD, n=4-6.
