# Supplementary material for: Targeting BCL2 with Venetoclax Enhances the Efficacy of the KRASG12D Inhibitor MRTX1133 in Pancreatic Cancer
Source: PubMed Central journal article supplement — Cancer Res. 2024 Aug 13;84(21):3629–39. doi: 10.1158/0008-5472.CAN-23-3574 (PMC11532783; doi:10.1158/0008-5472.can-23-3574), 2024-08-13
Supplement: can-23-3574_figure_s9_suppsf9.pdf [file can-23-3574_figure_s9_suppsf9.pdf]

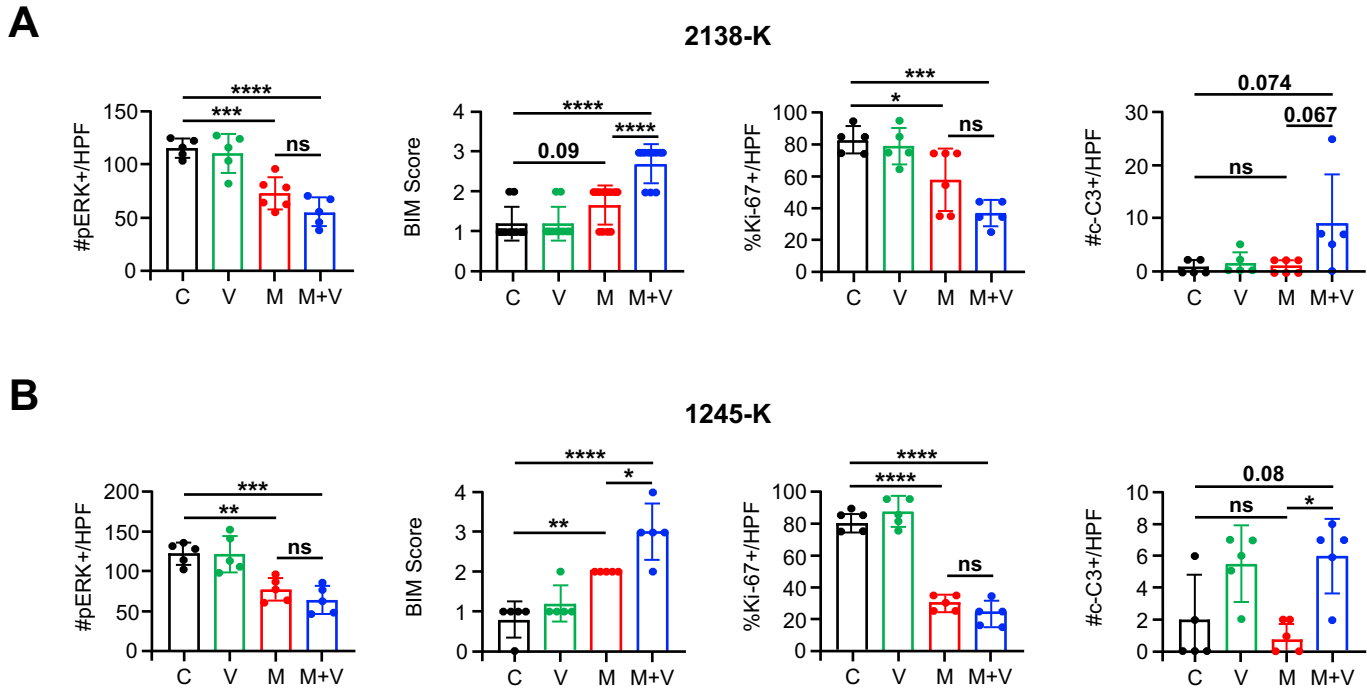

**Supplemental Figure S9: Venetoclax enhances the efficacy of MRTX1133 in 2138-K and 1245-K tumors *in vivo*.** 2138-K and 1245-K KPC cells ( $2.5 \times 10^4$ ) were implanted via subcutaneous injection into the flanks of C57BL/6 mice. Once animals developed  $\sim 80$ - $100$  mm<sup>3</sup> tumors, they were treated with vehicle control (C, DMSO), Venetoclax (V, 15mg/kg daily), MRTX1133 (M, 30mg/kg 2x/day), or the combination of Venetoclax and MRTX1133. **A, B.** 2138-K and 1245-K tumors at the study endpoints were stained for pERK, BIM, the proliferation marker Ki-67, and the apoptosis marker cleaved caspase 3 (c-C3). Error bars  $\pm$  SD. One-way ANOVA, followed by Tukey's multiple comparison test. \*,  $p < 0.05$ ; \*\*,  $p < 0.01$ ; \*\*\*,  $p < 0.001$ ; \*\*\*\*,  $p < 0.0001$ ; ns, not significant.
